# Supplementary material for: A highly thermally stable Y3AlGa4O12:Cr3+ phosphor for near-infrared pc-LEDs
Source: Royal Society of Chemistry journal article supplement (doi:10.1039/d3tc03407k), 2023-01-01
Supplement: d3tc03407k1.pdf [file d3tc03407k1.pdf]

# A highly thermally stable $\text{Y}_3\text{AlGa}_4\text{O}_{12}:\text{Cr}^{3+}$ phosphor for near-infrared pc-LEDs

Zhihang Yue,<sup>a, b</sup> Dashuai Sun,<sup>b\*</sup> Zeyu Lyu,<sup>b</sup> Sida Shen,<sup>b</sup> Chengliang Lyu,<sup>a, b</sup> Pengcheng Luo<sup>b</sup> and Hongpeng You<sup>a, b, c\*</sup>

<sup>a</sup> School of Rare Earths University of Science and Technology of China Hefei 230026, P. R. China.

E-mail : [hpyou@ciac.ac.cn](mailto:hpyou@ciac.ac.cn)

<sup>b</sup> Key Laboratory of Rare Earths, Chinese Academy of Sciences; Ganjiang Innovation Academy, Chinese Academy of Sciences, Ganzhou 341000, P. R. China. E-mail : [dssun@gia.cas.cn](mailto:dssun@gia.cas.cn)

<sup>c</sup> State Key Laboratory of Rare Earth Resource Utilization, Changchun Institute of Applied Chemistry, Chinese Academy of Sciences, Changchun 130022, P. R. China

\* Corresponding author. Fax: +86 431 8

## Figures and Figure Captions

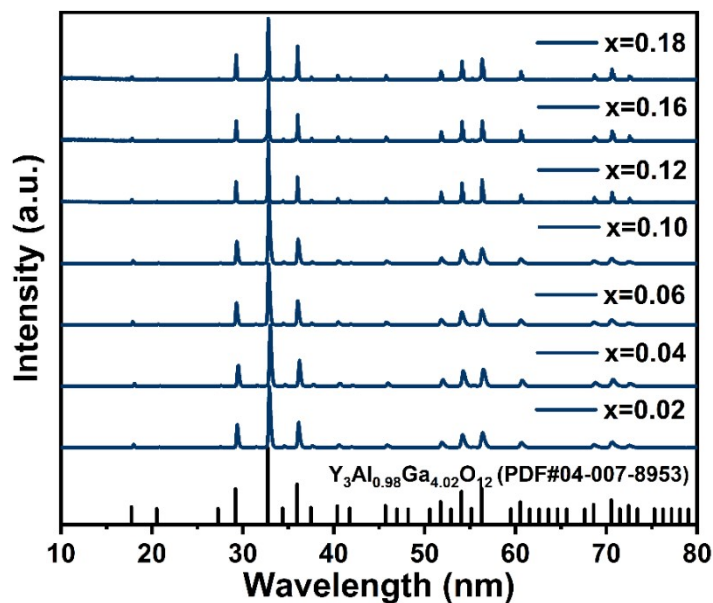

**Figure S1** XRD patterns of  $Y_3AlGa_{4-x}O_{12}:xCr^{3+}$  ( $x = 0-0.06, 0.10, 0.12, 0.16, 0.18$ ) samples, compared with the simulated XRD pattern of  $Y_3Al_{0.98}Ga_{4.02}O_{12}$  (PDF#04-007-8953).

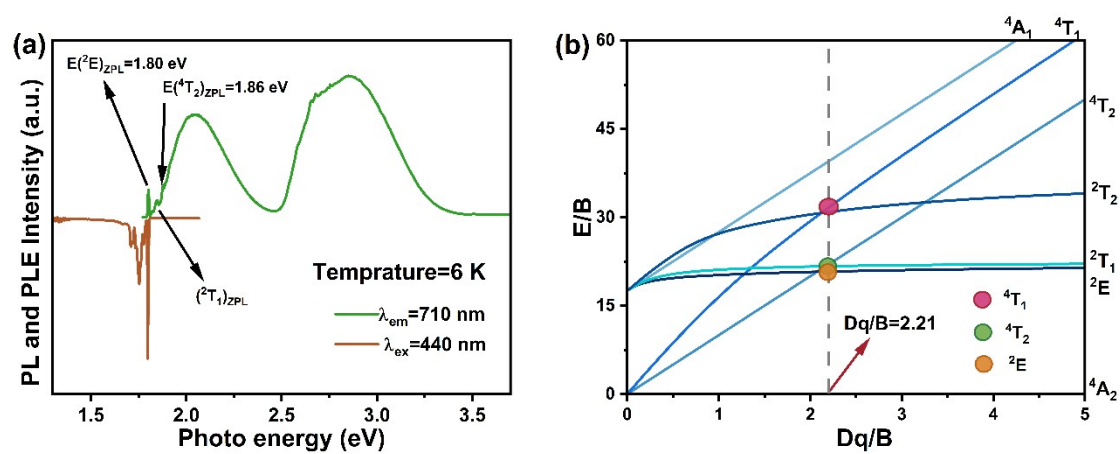

**Figure. S2** (a) PL and PLE spectra of YAGG:0.1Cr<sup>3+</sup> when T= 6 K; (b) Tanabe–Sugano energy-level diagram for a 3d<sup>3</sup> system in an octahedral crystal field.
